# Supplementary material for: Mineralogy and Geochemistry of Seabed Sediments of the Chiloé–Taitao Area, Southern Chile, and Implications for Ore Deposits
Source: MDPI journal article supplement (doi:10.3390/min11080903), 2021-08-21
Supplement: s1 [file s1]

# Mineralogy and Geochemistry of Seabed Sediments of the Chiloé–Taitao Area, Southern Chile, and Implications for Ore Deposits

**Table S1.** Geochemical results. Abbreviations: S = Sample, D = Duplicate, R = Repetition, A.S: Analyzed Standard, R.S: Reported Standard.

| Sample    | Type | Mo [ppm] | Cu [ppm] | Pb [ppm] | Zn [ppm] | Ni [ppm] | Co [ppm] | Mn [ppm] | Fe [wt.%] | As [ppm] | U [ppm] | Th [ppm] | Sr [ppm] | Sb [ppm] |
|-----------|------|----------|----------|----------|----------|----------|----------|----------|-----------|----------|---------|----------|----------|----------|
| 1         | S    | 1.1      | 51.9     | 14.1     | 135      | 30.7     | 18       | 699      | 7.03      | 17       | 4.1     | 5.7      | 353      | 0.9      |
| 2         | S    | 1.2      | 47.6     | 13.3     | 111      | 29.7     | 17       | 678      | 6.98      | 18       | 3.4     | 4        | 350      | 1        |
| 2         | D    | 1.2      | 52.1     | 13.9     | 126      | 42       | 14       | 662      | 4.87      | 7        | 2.5     | 5        | 324      | 0.6      |
| 2         | R    | 1.1      | 50       | 13.6     | 111      | 31.6     | 16       | 693      | 6.97      | 16       | 3.5     | 4.1      | 351      | 1.1      |
| 3         | S    | 0.7      | 17.9     | 10.7     | 66       | 33.5     | 14       | 669      | 5.56      | 10       | 1.8     | 6.1      | 269      | 0.5      |
| 4         | S    | 0.7      | 19.1     | 9.5      | 56       | 27.5     | 13       | 691      | 4.2       | 9        | 1.8     | 4.4      | 331      | <0.5     |
| 4         | D    | 0.7      | 21.6     | 9.1      | 71       | 26.4     | 15       | 719      | 4.28      | 7        | 1.6     | 4.4      | 328      | <0.5     |
| 5         | S    | <0.5     | 13.6     | 12.4     | 60       | 18.6     | 13       | 707      | 5.05      | 6        | 1.2     | 5        | 320      | 0.7      |
| 6         | S    | 1.5      | 34.5     | 11.5     | 99       | 28.9     | 14       | 693      | 4.38      | <5       | 2       | 7.3      | 336      | 0.6      |
| 7         | S    | 1.7      | 44.2     | 12.9     | 99       | 33.2     | 14       | 717      | 4.38      | 6        | 2       | 5.3      | 345      | 0.5      |
| 8         | S    | 0.8      | 42       | 12.1     | 90       | 27.9     | 15       | 787      | 4.46      | 9        | 1.9     | 5.1      | 351      | <0.5     |
| 9         | S    | 0.7      | 40.1     | 11.7     | 87       | 27.3     | 14       | 815      | 4.6       | <5       | 1.8     | 5.4      | 341      | <0.5     |
| 9         | D    | 1        | 40.1     | 11.5     | 97       | 28.1     | 14       | 823      | 4.84      | 6        | 1.8     | 5.5      | 357      | <0.5     |
| 10        | S    | 0.7      | 29.2     | 10.2     | 62       | 18.5     | 11       | 671      | 4.1       | <5       | 1.2     | 5.4      | 306      | <0.5     |
| 11        | S    | 1.1      | 48.5     | 10.6     | 81       | 27.2     | 14       | 714      | 4.29      | 6        | 1.5     | 5.4      | 332      | <0.5     |
| 12        | S    | 0.5      | 7.6      | 9.9      | 49       | 12.6     | 7        | 507      | 3.12      | 5        | 1       | 4.7      | 274      | <0.5     |
| 12        | R    | 0.6      | 7.7      | 10.2     | 50       | 11.9     | 7        | 501      | 3.08      | 7        | 1.1     | 5.2      | 270      | <0.5     |
| 13        | S    | <0.5     | 18.5     | 10.1     | 52       | 13       | 12       | 742      | 5.2       | 8        | 0.8     | 3.5      | 330      | <0.5     |
| 13        | D    | <0.5     | 15.9     | 10.3     | 56       | 12.7     | 13       | 775      | 5.4       | 9        | 1.2     | 5.2      | 328      | <0.5     |
| 14        | S    | 2.4      | 39.3     | 11.2     | 138      | 32.4     | 14       | 678      | 4.7       | 12       | 2.5     | 4.6      | 301      | <0.5     |
| 15        | S    | 1        | 25.4     | 9.7      | 73       | 40.1     | 25       | 1112     | 6.05      | 7        | 1       | 3.8      | 574      | <0.5     |
| 16        | S    | 1.8      | 36.3     | 8.9      | 117      | 29.6     | 16       | 737      | 4.3       | 7        | 2.3     | 4.2      | 241      | <0.5     |
| OREAS 605 | A.S  | 5.80     | 50117    | 1440     | 2257     | 1651     | 99       | 107      | 3.90      | 742      | 3.10    | 5.90     | 424      | 353.90   |
|           | A.S  | 5.00     | 51374    | 1481     | 2240     | 1661     | 105      | 102      | 4.06      | 581      | 3.10    | 5.70     | 403      | 353.20   |
|           | R.S  | 4.82     | 50200    | 1358     | 2190     | 1568     | 100      | 91       | 3.91      |          | 2.79    | 5.12     | 373      | 324.00   |
| OREAS 927 | A.S  | 1.00     | 11017    | 232      | 740      | 30       | 30       | 1282     | 8.96      | 8.00     | 2.80    | 15.30    | 32       | 1.90     |
|           | R.S  | 1.06     | 10800    | 223      | 772      | 31       | 31       | 1217     | 8.56      | 9.20     | 2.70    | 14.40    | 29       | 1.90     |

Table S1. Cont.

| Sample    | Type | V [ppm] | Ca [wt.%] | P [wt.%] | La [ppm] | Cr [ppm] | Mg [wt.%] | Ba [ppm] | Ti [wt.%] | Al [wt.%] | Na [wt.%] | K [wt.%] | W [ppm] | Zr [ppm] | Ce [ppm] |
|-----------|------|---------|-----------|----------|----------|----------|-----------|----------|-----------|-----------|-----------|----------|---------|----------|----------|
| 1         | S    | 159     | 5.54      | 0.1      | 13.4     | 79       | 1.78      | 415      | 0.515     | 7.8       | 2.81      | 1.74     | <0.5    | 80.6     | 29       |
| 2         | S    | 154     | 5.56      | 0.11     | 13.5     | 79       | 1.76      | 430      | 0.516     | 7.61      | 2.71      | 1.71     | 0.6     | 79.9     | 30       |
| 2         | D    | 130     | 4.45      | 0.11     | 14.3     | 75       | 1.7       | 475      | 0.484     | 7.59      | 3.2       | 1.31     | 1       | 64.6     | 30       |
| 2         | R    | 157     | 5.58      | 0.11     | 13.4     | 78       | 1.77      | 414      | 0.518     | 7.69      | 2.74      | 1.71     | 0.5     | 80.8     | 28       |
| 3         | S    | 151     | 3.73      | 0.09     | 15.5     | 91       | 1.65      | 234      | 0.537     | 7.92      | 2.6       | 1.24     | 0.7     | 66.9     | 35       |
| 4         | S    | 130     | 4.57      | 0.09     | 15.3     | 51       | 1.56      | 258      | 0.456     | 7.91      | 2.89      | 1.08     | 0.6     | 73.4     | 33       |
| 4         | D    | 133     | 4.33      | 0.08     | 16.2     | 55       | 1.54      | 259      | 0.452     | 7.79      | 2.89      | 1.14     | 0.7     | 58.6     | 34       |
| 5         | S    | 126     | 3.74      | 0.1      | 17.4     | 58       | 1.37      | 253      | 0.456     | 7.6       | 2.72      | 1.29     | 0.5     | 46       | 35       |
| 6         | S    | 133     | 4.5       | 0.09     | 16.6     | 52       | 1.62      | 346      | 0.456     | 7.23      | 3.07      | 1.24     | 0.7     | 56.4     | 33       |
| 7         | S    | 130     | 4.85      | 0.1      | 16.3     | 54       | 1.66      | 435      | 0.453     | 7.13      | 3.21      | 1.29     | 0.6     | 57.5     | 33       |
| 8         | S    | 140     | 4.57      | 0.1      | 17.8     | 48       | 1.7       | 446      | 0.478     | 7.75      | 3.09      | 1.36     | 0.7     | 58.5     | 35       |
| 9         | S    | 138     | 4.27      | 0.08     | 18       | 50       | 1.7       | 521      | 0.49      | 7.89      | 3.02      | 1.39     | 0.6     | 62.4     | 38       |
| 9         | D    | 140     | 4.55      | 0.09     | 18.6     | 55       | 1.76      | 525      | 0.513     | 8.27      | 3.18      | 1.39     | 0.6     | 64.7     | 38       |
| 10        | S    | 118     | 3.51      | 0.09     | 17.8     | 52       | 1.22      | 272      | 0.432     | 7.38      | 2.8       | 1.15     | 0.6     | 42.8     | 36       |
| 11        | S    | 127     | 3.31      | 0.09     | 17.6     | 54       | 1.6       | 386      | 0.447     | 7.54      | 3.1       | 1.48     | 0.6     | 54.8     | 36       |
| 12        | S    | 77      | 2.37      | 0.07     | 16.2     | 38       | 0.91      | 258      | 0.327     | 6.58      | 2.66      | 1.24     | <0.5    | 36.3     | 33       |
| 12        | R    | 74      | 2.34      | 0.07     | 17.1     | 36       | 0.9       | 280      | 0.321     | 6.5       | 2.63      | 1.23     | <0.5    | 38.5     | 33       |
| 13        | S    | 122     | 3.26      | 0.07     | 13.3     | 34       | 1.27      | 270      | 0.398     | 7.54      | 2.74      | 1.48     | <0.5    | 44.1     | 28       |
| 13        | D    | 115     | 3.29      | 0.07     | 13.8     | 37       | 1.26      | 263      | 0.398     | 7.54      | 2.75      | 1.44     | <0.5    | 52       | 27       |
| 14        | S    | 133     | 3.76      | 0.11     | 14.9     | 54       | 1.69      | 248      | 0.458     | 7.06      | 3.25      | 1.26     | 0.7     | 65.9     | 32       |
| 15        | S    | 168     | 8.29      | 0.09     | 14.6     | 61       | 2.58      | 241      | 0.539     | 7.32      | 2.55      | 0.96     | 0.8     | 78.3     | 30       |
| 16        | S    | 127     | 2.88      | 0.09     | 13.8     | 53       | 1.61      | 217      | 0.436     | 6.76      | 3.19      | 1.08     | 0.7     | 64.5     | 30       |
| OREAS 605 | A.S  | 42.0    | 0.28      | 0.05     | 13.70    | 23       | 0.05      | 186      | 0.18      | 5.67      | 0.60      | 1.16     | 27.80   | 92.40    | 28       |
|           | A.S  | 41.0    | 0.30      | 0.05     | 11.90    | 22       | 0.06      | 437      | 0.17      | 5.53      | 0.63      | 1.14     | 29.90   | 89.90    | 28       |
|           | R.S  | 39.9    | 0.28      | 0.05     | 11.30    | 24       | 0.05      |          | 0.18      | 5.43      | 0.58      | 1.04     | 27.00   | 84.00    | 25       |
| OREAS 927 | A.S  | 79.0    | 0.42      | 0.06     | 41.00    | 64       | 2.19      | 322      | 0.33      | 6.84      | 0.16      | 1.91     | 7.30    | 96.80    | 79       |
|           | R.S  | 77.0    | 0.39      | 0.05     | 39.00    | 63       | 2.11      | 314      | 0.32      | 6.41      | 0.17      | 1.87     | 8.10    | 94.00    | 73       |

Table S1. Cont.

[illegible]
